# Supplementary material for: Can bicarbonate replace phosphate to improve the sustainability of bioelectrochemical systems for H2production?
Source: Royal Society of Chemistry journal article supplement (doi:10.1039/c5ra00702j), 2015-01-01
Supplement: c5ra00702j1.pdf [file c5ra00702j1.pdf]

## Supplementary Information (SI)

### **Can bicarbonate replace phosphate to improve the sustainability of bioelectrochemical systems for H<sub>2</sub> production?**

Dawei Liang<sup>a,\*</sup>, Weiwei Xu<sup>a</sup>, Yanyan Liu<sup>a</sup>, Sikan Peng<sup>a</sup>, Beizhen Xie<sup>b</sup>, Shanfu Lu<sup>a</sup>,  
Yan Xiang<sup>a</sup>, Hong Liu<sup>b</sup>

<sup>a</sup> Beijing Key Laboratory of Bio-inspired Energy Materials and Devices, Beihang University, Beijing, 100191, China

<sup>b</sup> Laboratory of Environmental Biology and Life Support Technology, School of Biological Science and Medical Engineering, Beihang University, Beijing, 100191, China

\*Corresponding author: Dawei Liang

Email: [liangdw@buaa.edu.cn](mailto:liangdw@buaa.edu.cn)

Tel: +86-10-82339539

**Table S1.** pH and conductivity of different electrolyte buffer systems

| <b>Buffer type</b> | <b>Phosphate (%)</b> | <b>Bicarbonate (%)</b> | <b>pH</b> | <b>Conductivity (S/m)</b> |
|--------------------|----------------------|------------------------|-----------|---------------------------|
| P/C@100%           | 100                  | 0                      | 7.04      | 1.13                      |
| P/C@20%            | 20                   | 80                     | 8.40      | 1.30                      |
| P/C@0.8%           | 0.8                  | 99.2                   | 8.45      | 1.74                      |
| P/C@0%             | 0                    | 100                    | 8.47      | 1.80                      |

**Table S2.** The BLAST results of the distinct DGGE band DNA in the bioanode of MECs and MFCs operated with different buffers

| Sample | Species                                | Closest gene sequence                                          | Identities        |
|--------|----------------------------------------|----------------------------------------------------------------|-------------------|
| OTU-1  | <i>Spirochaetaceae</i> sp.             | <i>Spirochaetaceae</i> bacterium<br>S37_12_1 LK391556.1        | 151/151<br>(100%) |
| OTU-2  | <i>Geoalkalibacter ferrihydriticus</i> | Uncultured bacterium<br>C4 AB630334.1                          | 147/148(9<br>9%)  |
| OTU-3  | —                                      | Uncultured bacterium TB003-<br>114 AB196087.1                  | 131/132<br>(99%)  |
| OTU-4  | <i>Soehngenia</i> sp.                  | <i>Soehngenia</i> sp.<br>B312138 HQ133002.1                    | 120/122<br>(98%)  |
| OTU-5  | <i>Soehngenia</i> sp.                  | <i>Soehngenia</i> sp.<br>B312138 HQ133002.1                    | 127/127<br>(100%) |
| OTU-6  | <i>Geobacter</i> sp.                   | Uncultured <i>Geobacter</i> sp. MEC25-<br>11 HM124838.1        | 152/152(1<br>00%) |
| OTU-7  | <i>Bacteroidetes</i> sp.               | Uncultured <i>Bacteroidetes</i><br>bacterium C1016S KF193877.1 | 147/148<br>(99%)  |
| OTU-8  | <i>Geobacter</i> sp.                   | Uncultured bacterium<br>MFC4P_296 JF309187.1                   | 152/152<br>(100%) |
| OTU-9  | <i>Nitriicola</i> sp.                  | <i>Nitriicola</i> sp.<br>LAR05R9 JX945779.1                    | 157/158<br>(99%)  |
| OTU-10 | <i>Geobacter</i> sp.                   | Uncultured bacterium<br>MEC_Bicarb_Ac-041 GQ152932.1           | 162/162<br>(100%) |
| OTU-11 | <i>Geobacter</i> sp.                   | Uncultured bacterium MECB5-<br>C04 KF171498.1                  | 144/145<br>(99%)  |
| OTU-12 | <i>Clostridium</i> sp.                 | Uncultured <i>Clostridium</i> sp.<br>8 JX548536.1              | 147/147<br>(100%) |
| OTU-13 | <i>Clostridium</i> sp.                 | Uncultured <i>Clostridium</i> sp.<br>8 JX548536.1              | 143/144<br>(99%)  |
| OTU14  | —                                      | <i>Acholeplasmamorum</i> strain 72-<br>043 NR_042959.1         | 112/120<br>(93%)  |
| OTU15  | —                                      | <i>Acholeplasmamorum</i> strain 72-<br>043 NR_042959.1         | 112/120<br>(93%)  |

**Table S3.** The BLAST results of the distinct DGGE band DNA in the bioanode of MECs with different applied voltages (0.5 V~1.0 V) and different time slot

| Sample  | Species                | Closest gene sequence                                                | Identities    |
|---------|------------------------|----------------------------------------------------------------------|---------------|
| OTU-S1  | <i>Clostridium</i> sp. | Uncultured <i>Clostridium</i> sp. isolate DGGE gel band 8 JX548536.1 | 146/146(100%) |
| OTU-S2  | <i>Arcobacter</i> sp.  | Uncultured bacterium clone SanDiego_a6357 KF799750.1                 | 138/138(100%) |
| OTU-S3  | <i>Pseudomonas</i> sp. | <i>Pseudomonas</i> sp. GRPAa2 GU939693.1                             | 144/148(97%)  |
| OTU-S4  | <i>Geobacter</i> sp.   | Uncultured bacterium clone MFC4P_296 JF309187.1                      | 151/151(100%) |
| OTU-S5  | <i>Geobacter</i> sp.   | <i>Geobacter</i> sp. GSS01 KJ620987.1                                | 151/151(100%) |
| OTU-S6  | <i>Geobacter</i> sp.   | <i>Geobacter</i> sp. GSS01 KJ620987.1                                | 148/152(97%)  |
| OTU-S7  | <i>Geobacter</i> sp.   | <i>Geobacter</i> sp. GSS01 KJ620987.1                                | 150/153(98%)  |
| OTU-S8  | <i>Geobacter</i> sp.   | <i>Geobacter</i> sp. GSS01 KJ620987.1                                | 149/149(100%) |
| OTU-S9  | <i>Geobacter</i> sp.   | Uncultured bacterium clone MFC4P_296 JF309187.1                      | 149/149(100%) |
| OTU-S10 | <i>Geobacter</i> sp.   | Uncultured bacterium clone MFC4P_296 JF309187.1                      | 149/149(100%) |

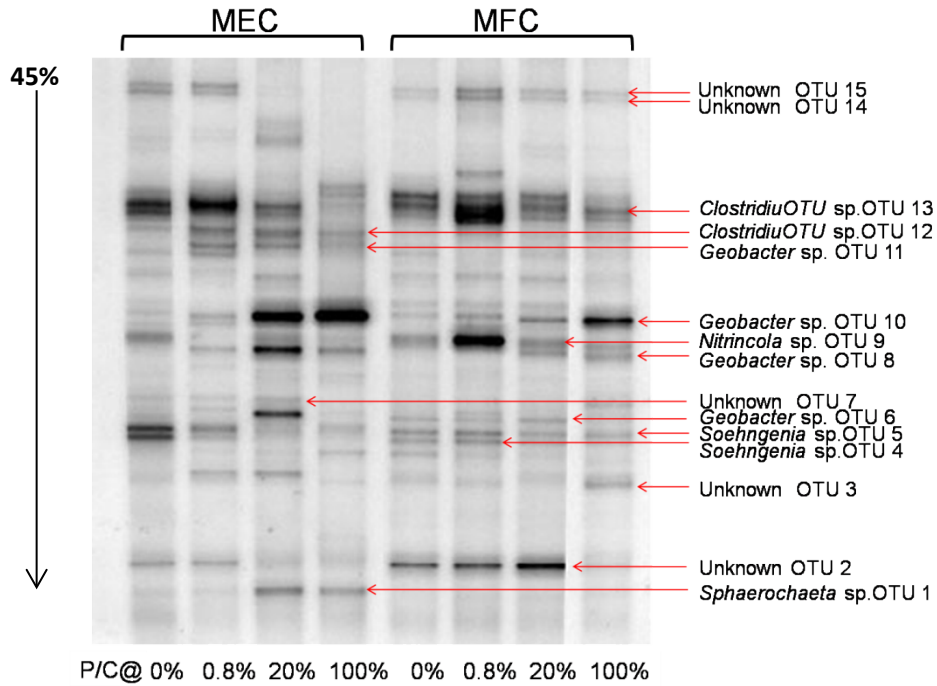

**Fig. S1** The DGGE profile showing the microbial diversity and population in the bioanodes of MECs, together with their precursor MFCs. All MECs and MFCs were operated with electrolyte buffers at different P/C ratios (with a total concentration of 0.1 M). The formamide gradient in DGGE gel is from 45% to 60%.

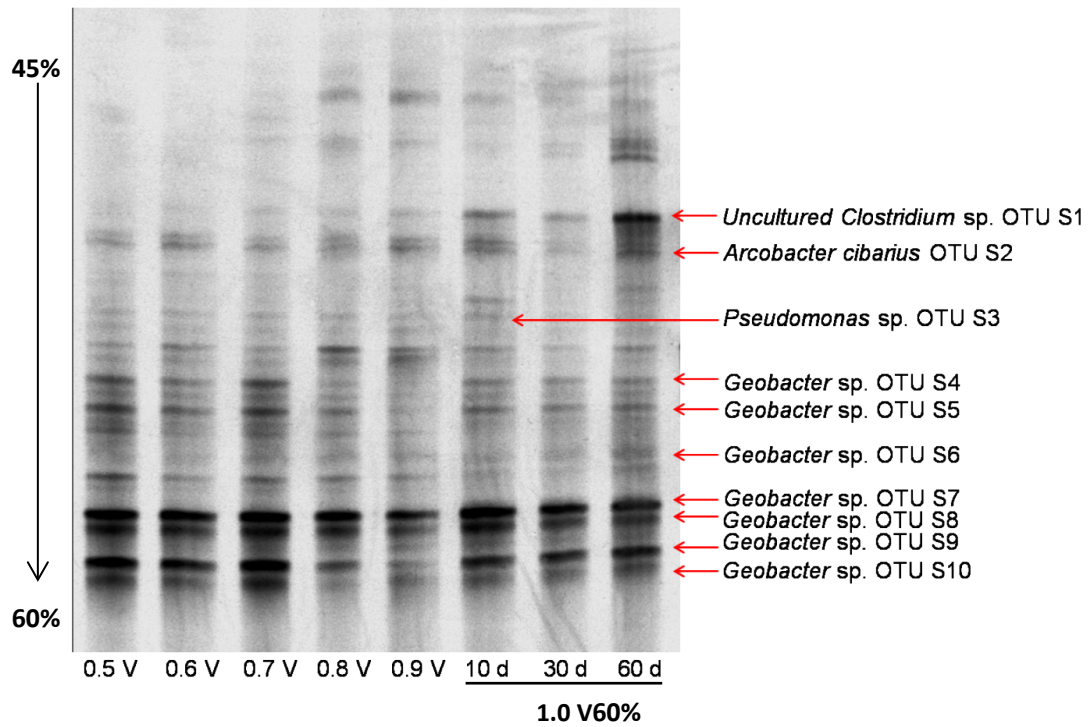

**Fig.S2** The DGGE profile showing the microbial diversity and population in the bioanodes of MECs operated under different applied voltages (0.5 V~1.0V) and different time slot (1.0V: 10 d, 30 d, 60 d). All MECs were operated with the electrolyte buffers at P/C@20% (total concentration: 0.1 M). The formamide gradient in DGGE gel is from 45% to 60%.
